# Supplementary material
Source: Springer Nature journal article supplement (https://www.springermedizin.de/resource/supplementary/13012_2010_333_MOESM10_ESM.pdf/9629794)

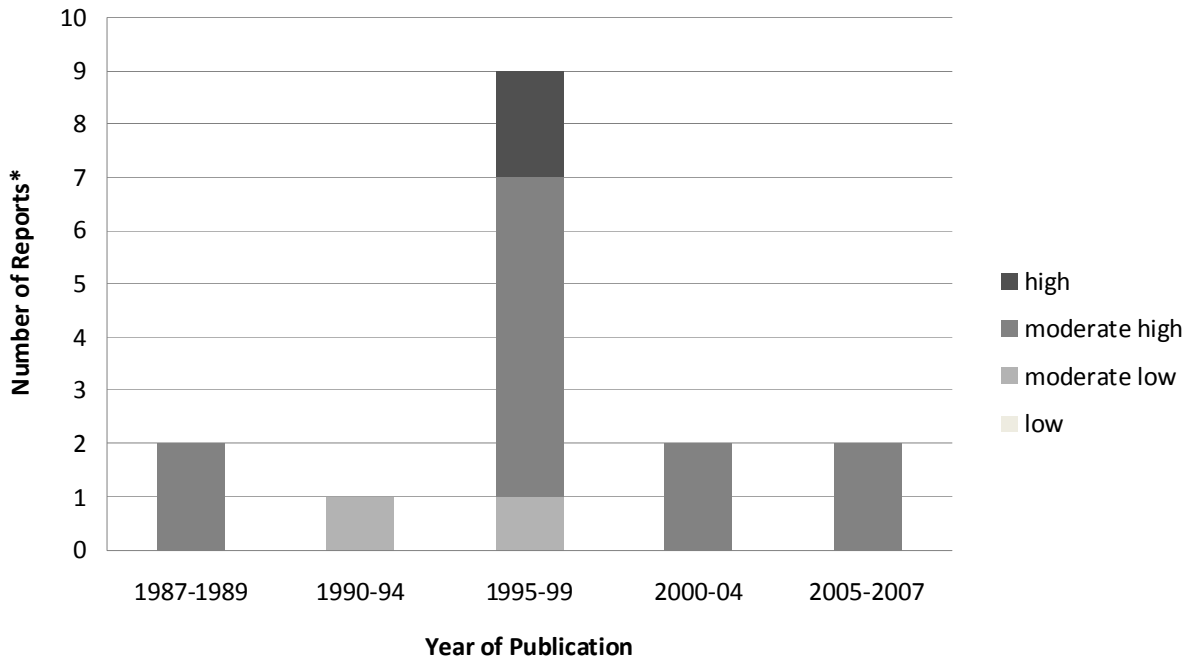

Supplement: MOESM10 [file 9629794]
